# Supplementary material for: DNA-RNA Hybrid (R-Loop): From a Unified Picture of the Mammalian Telomere to the Genome-Wide Profile
Source: MDPI journal article supplement (doi:10.3390/cells10061556), 2021-06-19
Supplement: s1 [file s1]

## Supplementary Figures

### **DNA-RNA hybrid (R-loop):**

### **from a unified picture of the mammalian telomere to the genome-wide profile**

Minoo Rassoulzadegan<sup>1\*</sup>, Ali Sharifi-Zarchi<sup>2</sup> and Leila Kianmehr<sup>3</sup>

(1) Université Cote d'Azur (UCA) , INSERM-CNRS, IRCAN, 06107 Nice France

(2) Computer Engineering Department, Sharif University of Technology Tehran,  
1458889694, Iran sharifi@sharif.edu

(3) Animal Sciences and Biotechnology Department, Faculty of Life Sciences and  
Biotechnology,

Shahid Beheshti University, Tehran 1983963113, Iran; kianmehr96@gmail.com

Running title: **R-loop in paternal genome**

**Key words: sperm, TERRA, telomere, R-loop, genome-wide transcripts**

\*corresponding author: minoo@unice.fr

## Supplementary Figures and Tables

**Supplementary Figure S1a.** Schema of the nucleic acid extraction protocol and blot analysis.

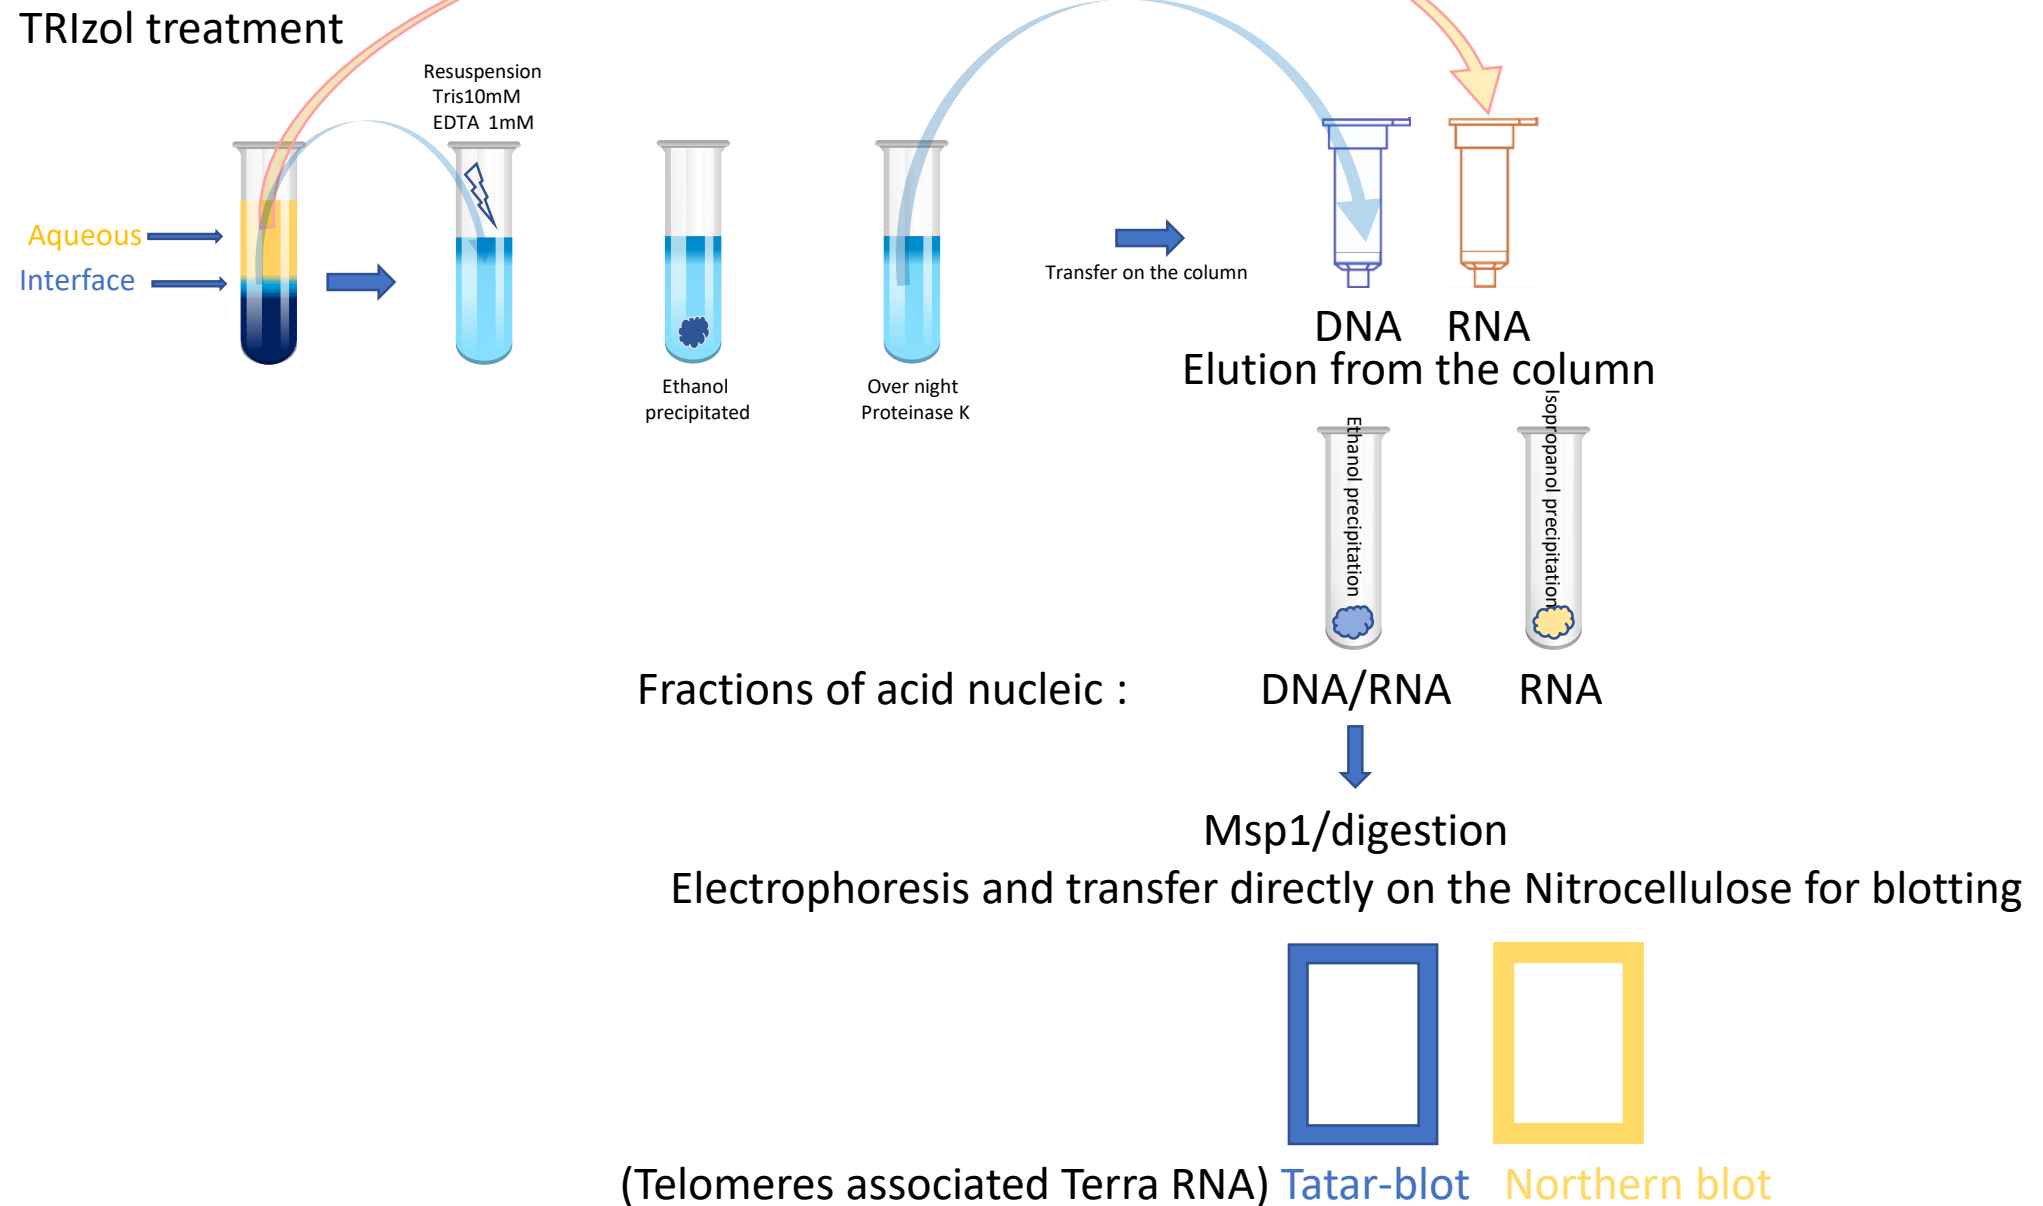

**Supplementary Figure S1b.** Schema of the nucleic acid extraction protocol and for samples preparation for RNA sequencing analysis.

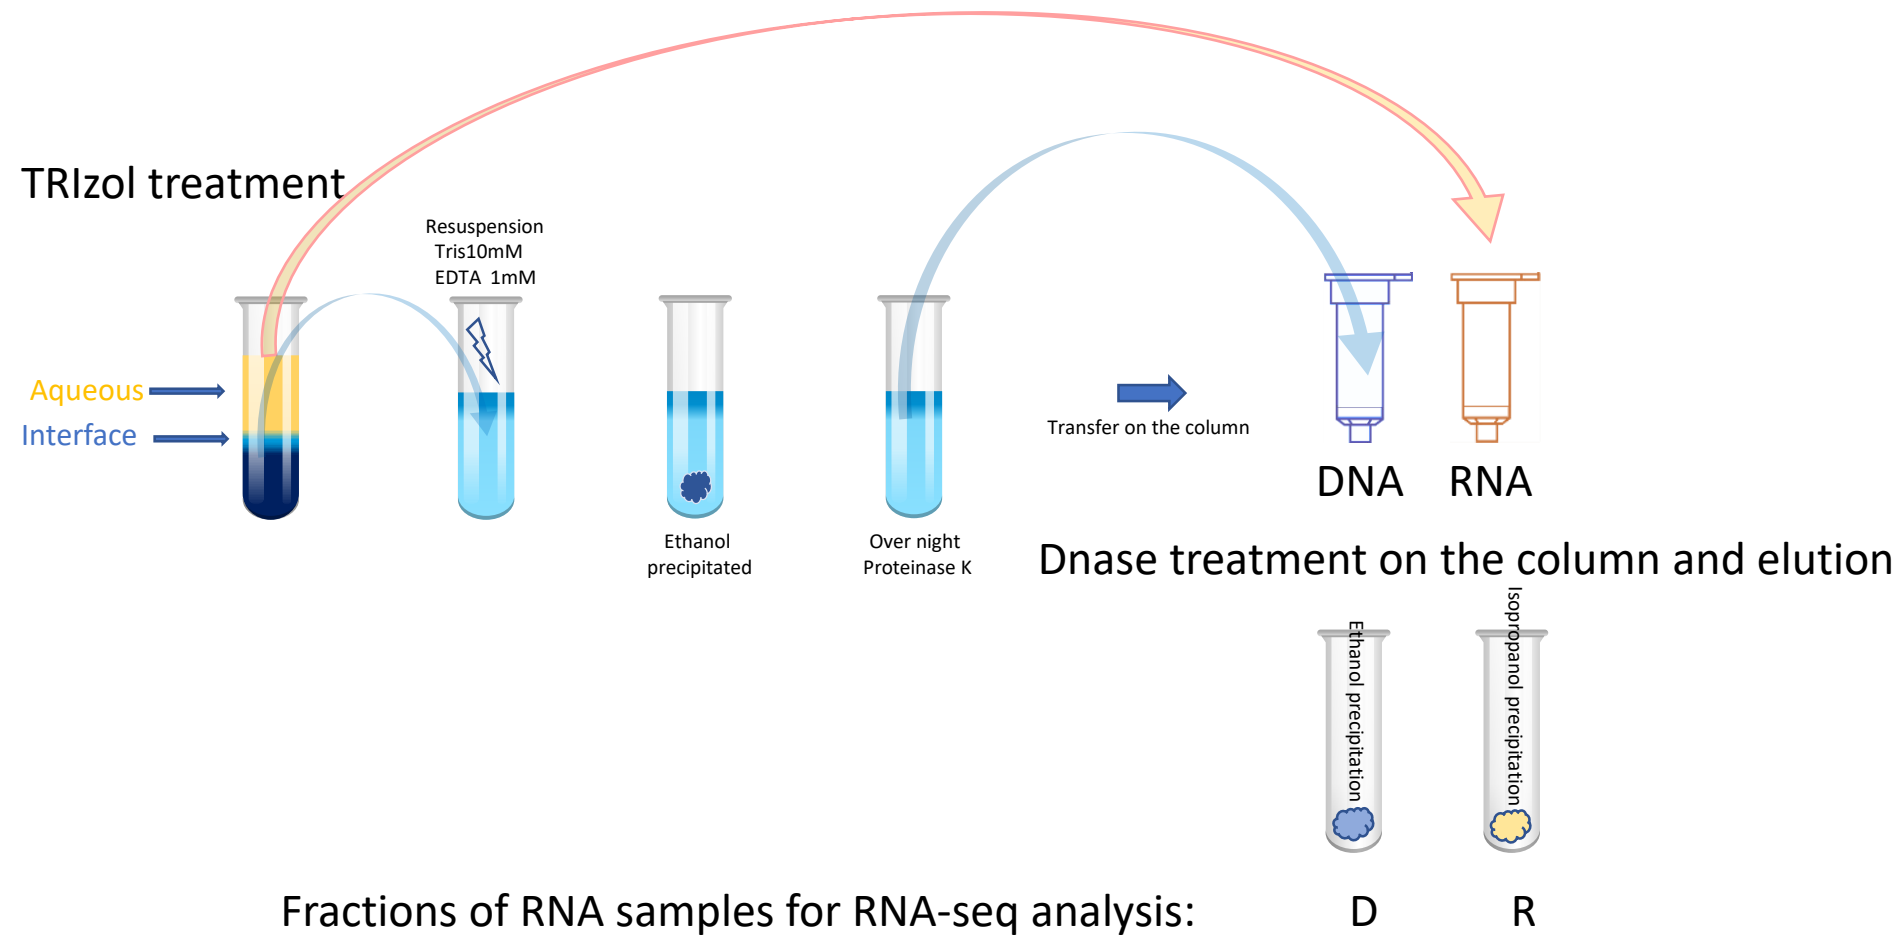

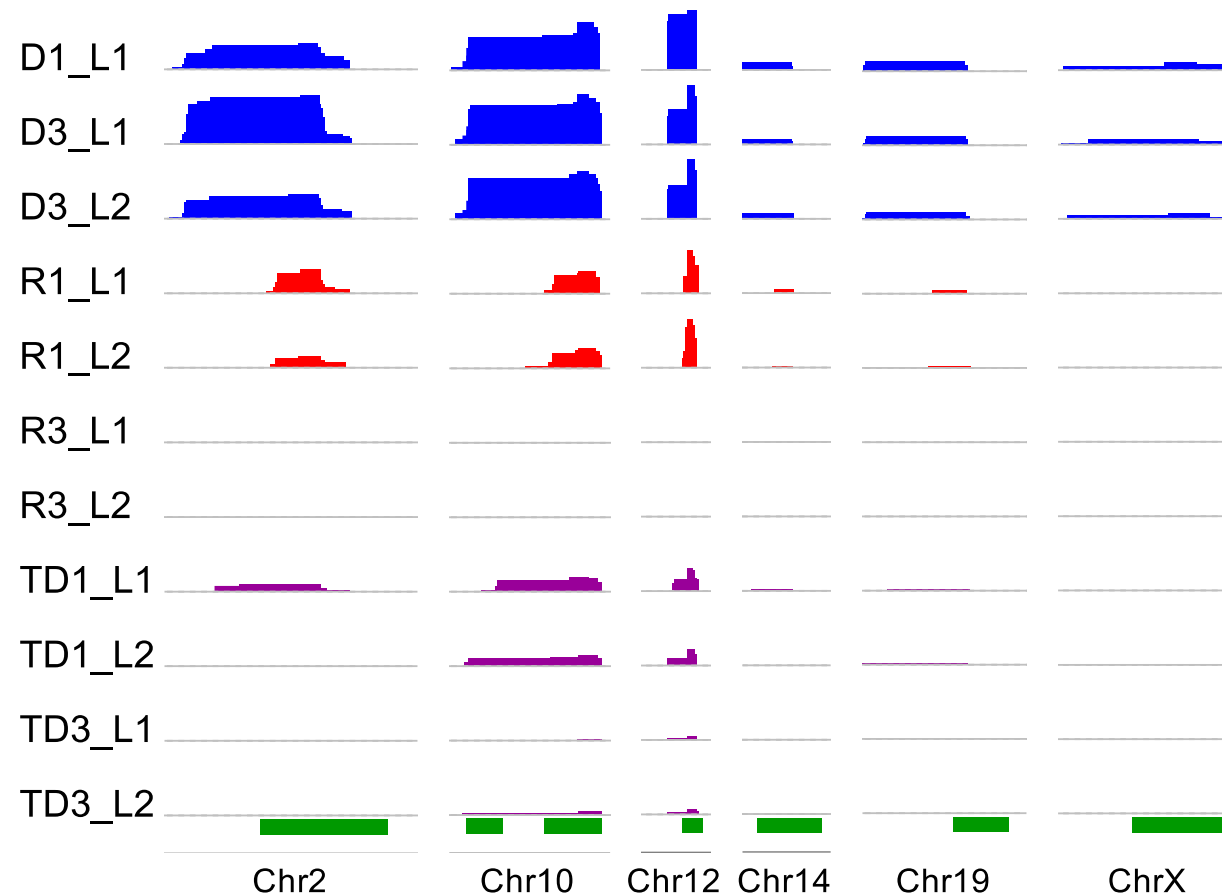

**Supplementary Figure S2.** RNA-seq signals over TERRA sequences at q-arm telomeric regions of several mice chromosomes. Each track shows a different sample 1 (male of six months) and 3 (male of 14 month) D1-D3 are DNA-bound RNA, R1-R3 are cytoplasmic RNA from sperm, and TD1-TD3 are DNA-bound RNA from testes. The heights of the peaks show normalized expression level (number of reads per 10<sup>7</sup> reads) over each genomic region, with equal 0-50 scale. The green track shows location of TERRA sequences in mice genome (minimum four consecutive TTAGGG repeats).

### **Supplementary Figure S3.**

Part of Bioinformatics method for Supplementary Fig. 3 description:

Reads with a length of less than 20 bp were discarded. Samples were then directly quantified using Salmon v0.12.0<sup>38</sup> on an index built from the GRCm38 genome using GENCODE vM18. RNA composition estimation (Supplementary Fig. 3) were created by summing the reads of transcripts from the same RNA biotype and dividing by the total number of assigned reads in each sample<sup>39</sup>.

## RNA composition

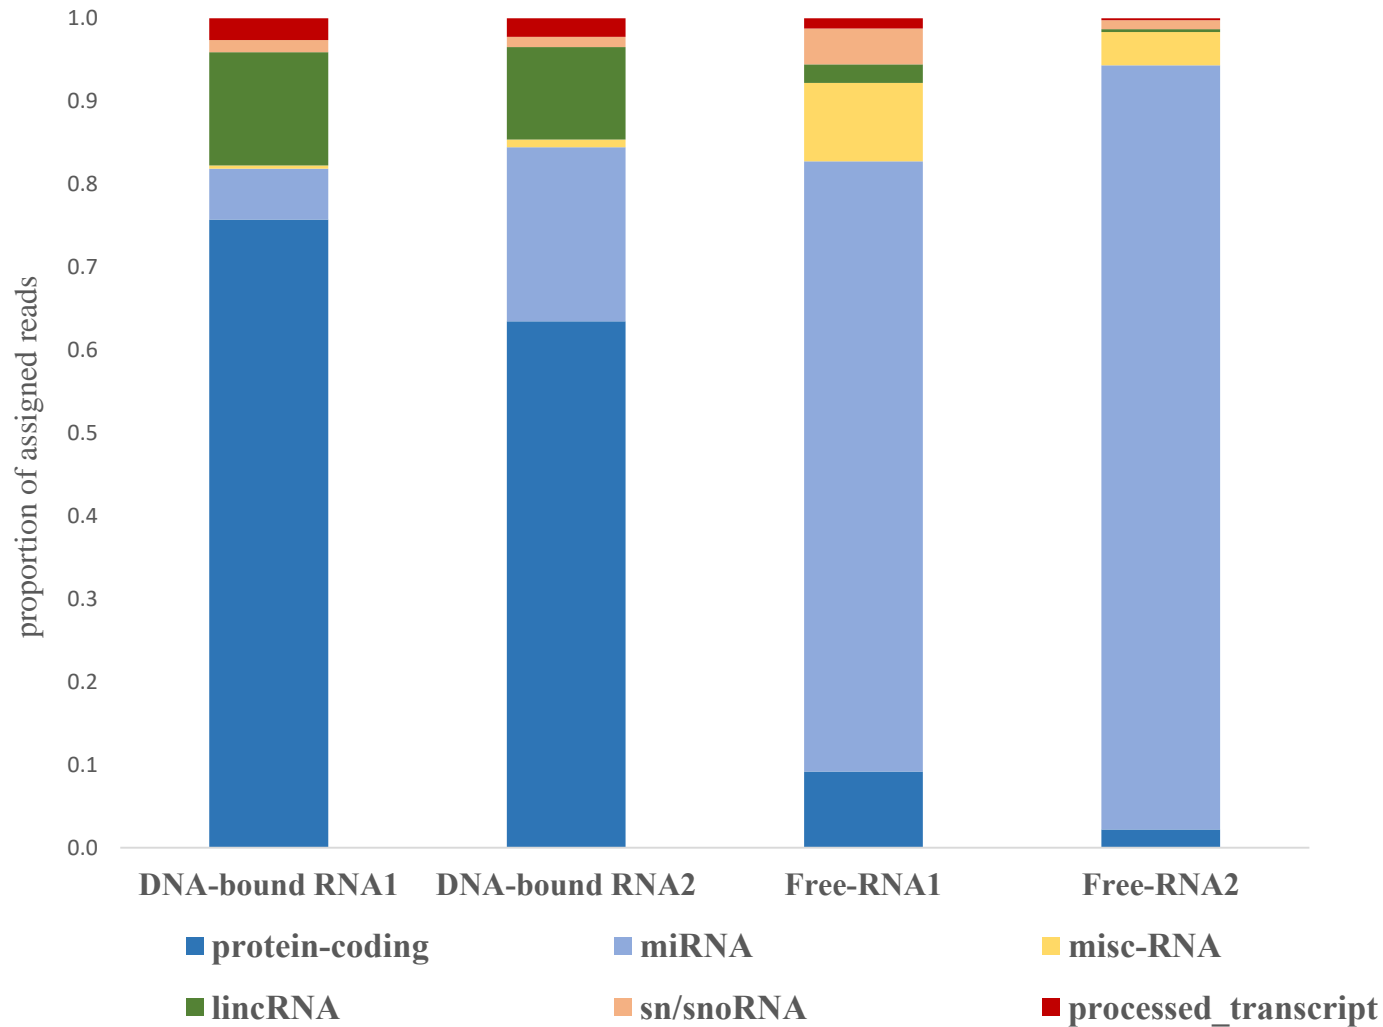

**a.** RNA composition revealed by high-throughput RNA sequencing in sperm. Sperm transcriptome of free-RNA and DNA-bound RNA, resulting from individual mice (6 and 14 months old) reveals variable levels of transcripts mapping to protein-coding RNA, microRNA (miRNA), miscRNA, long intergenic non-coding RNA (lincRNA), sn/snoRNA and processed-transcript\*. Y-axis shows the proportion of assigned reads in biological replicates of each sample group.

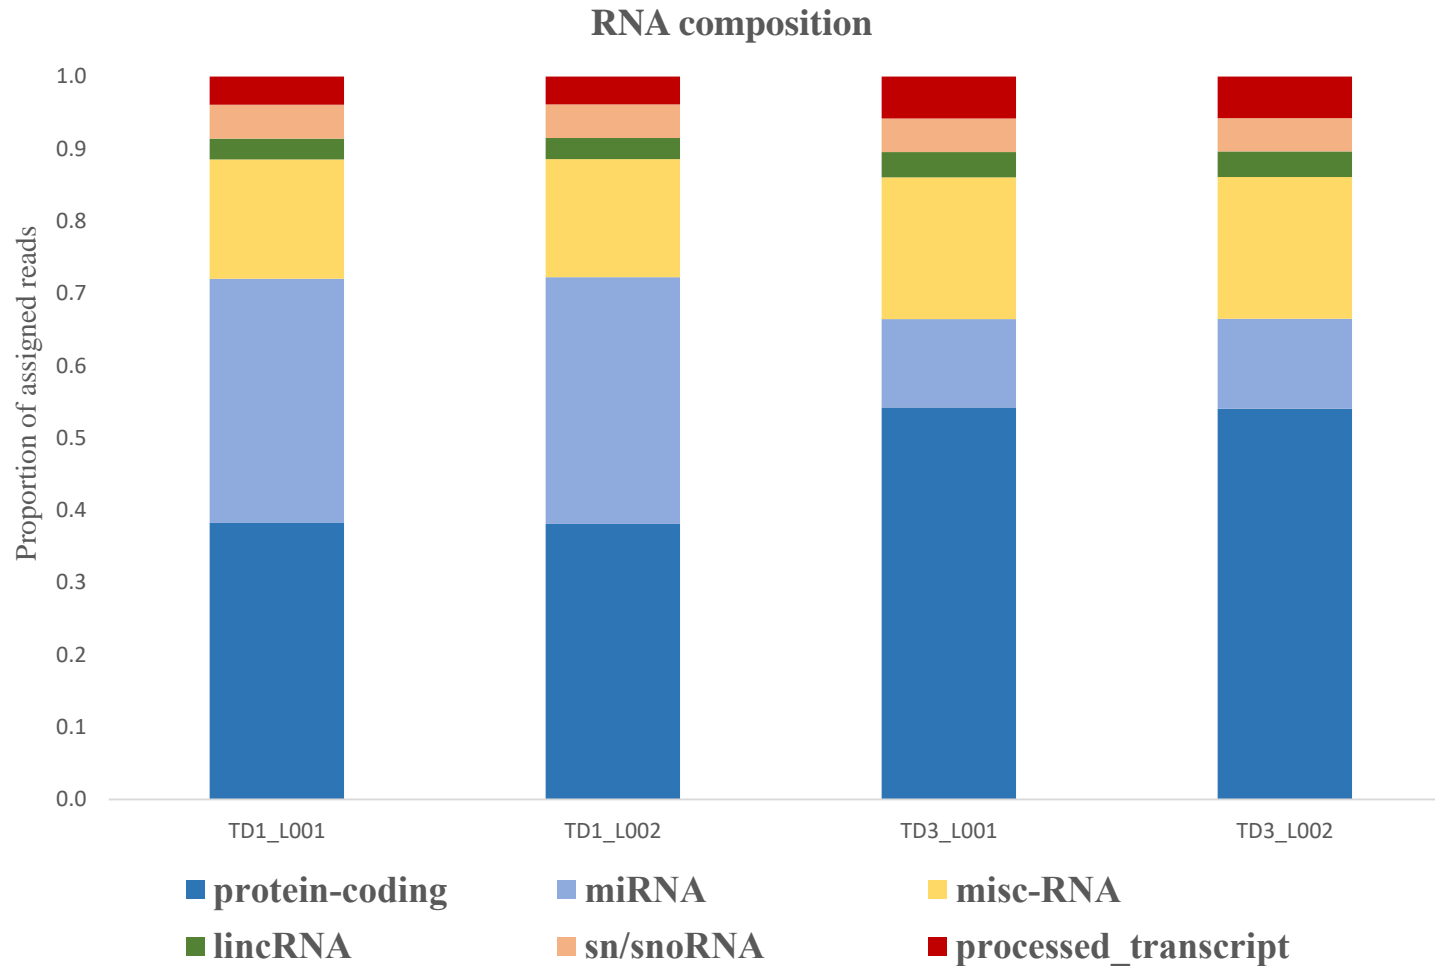

**b.** RNA composition revealed by high-throughput RNA sequencing in testis. Transcriptome of testis of DNA-bound RNA (TD), resulting from individual mice (6 and 14 months old) reveals levels of transcripts mapping to protein-coding RNA, microRNA (miRNA), miscRNA, long intergenic non-coding RNA (lincRNA), sn/snoRNA and processed-transcript\*. Y-axis shows the proportion of assigned reads in biological replicates of each sample group.

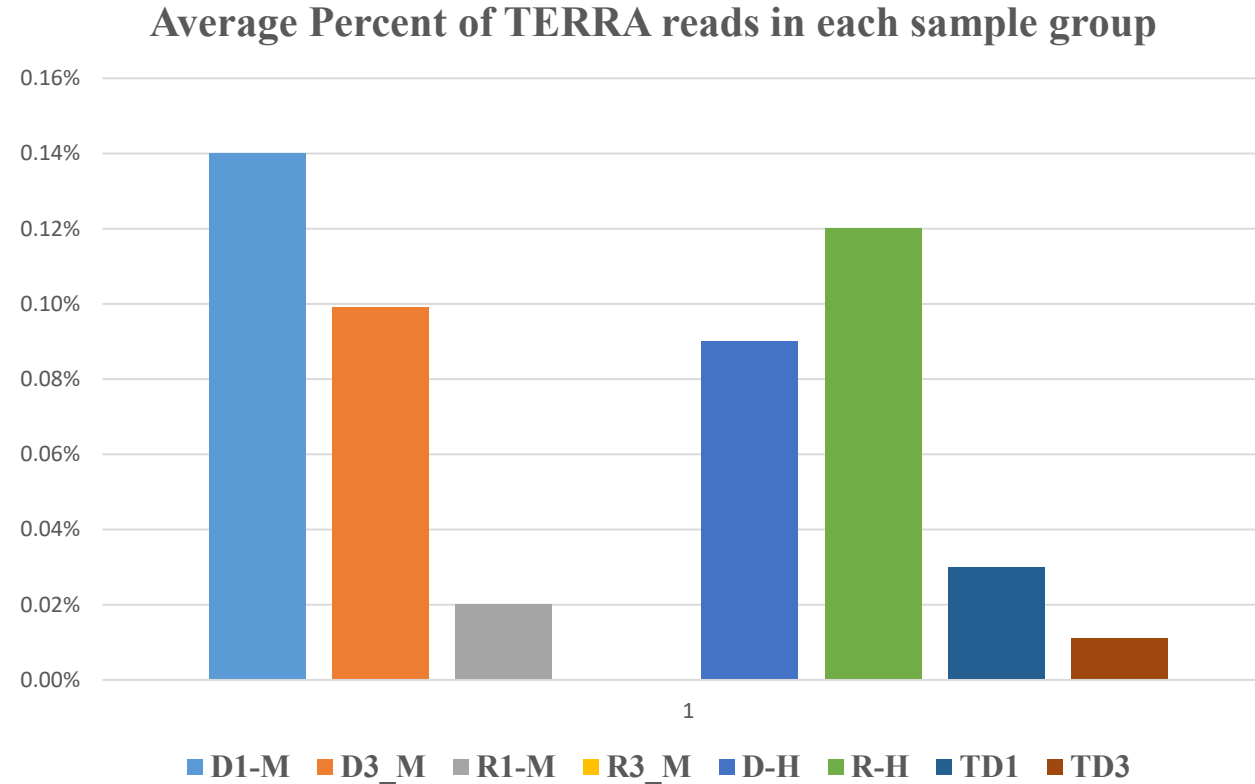

**c.** Percent of TERRA\* (minimum four consecutive CCCTAA repeats) revealed by high-throughput RNA sequencing of sperm of mouse DNA-bound RNA (D-M) sperm, TD1, TD3 testes and human DNA-bound RNA (D-H) and free-RNA (R-H), Y-axis shows the TERRA percent of assigned reads.

Wide expression signals of transcripts over mouse chromosomes.

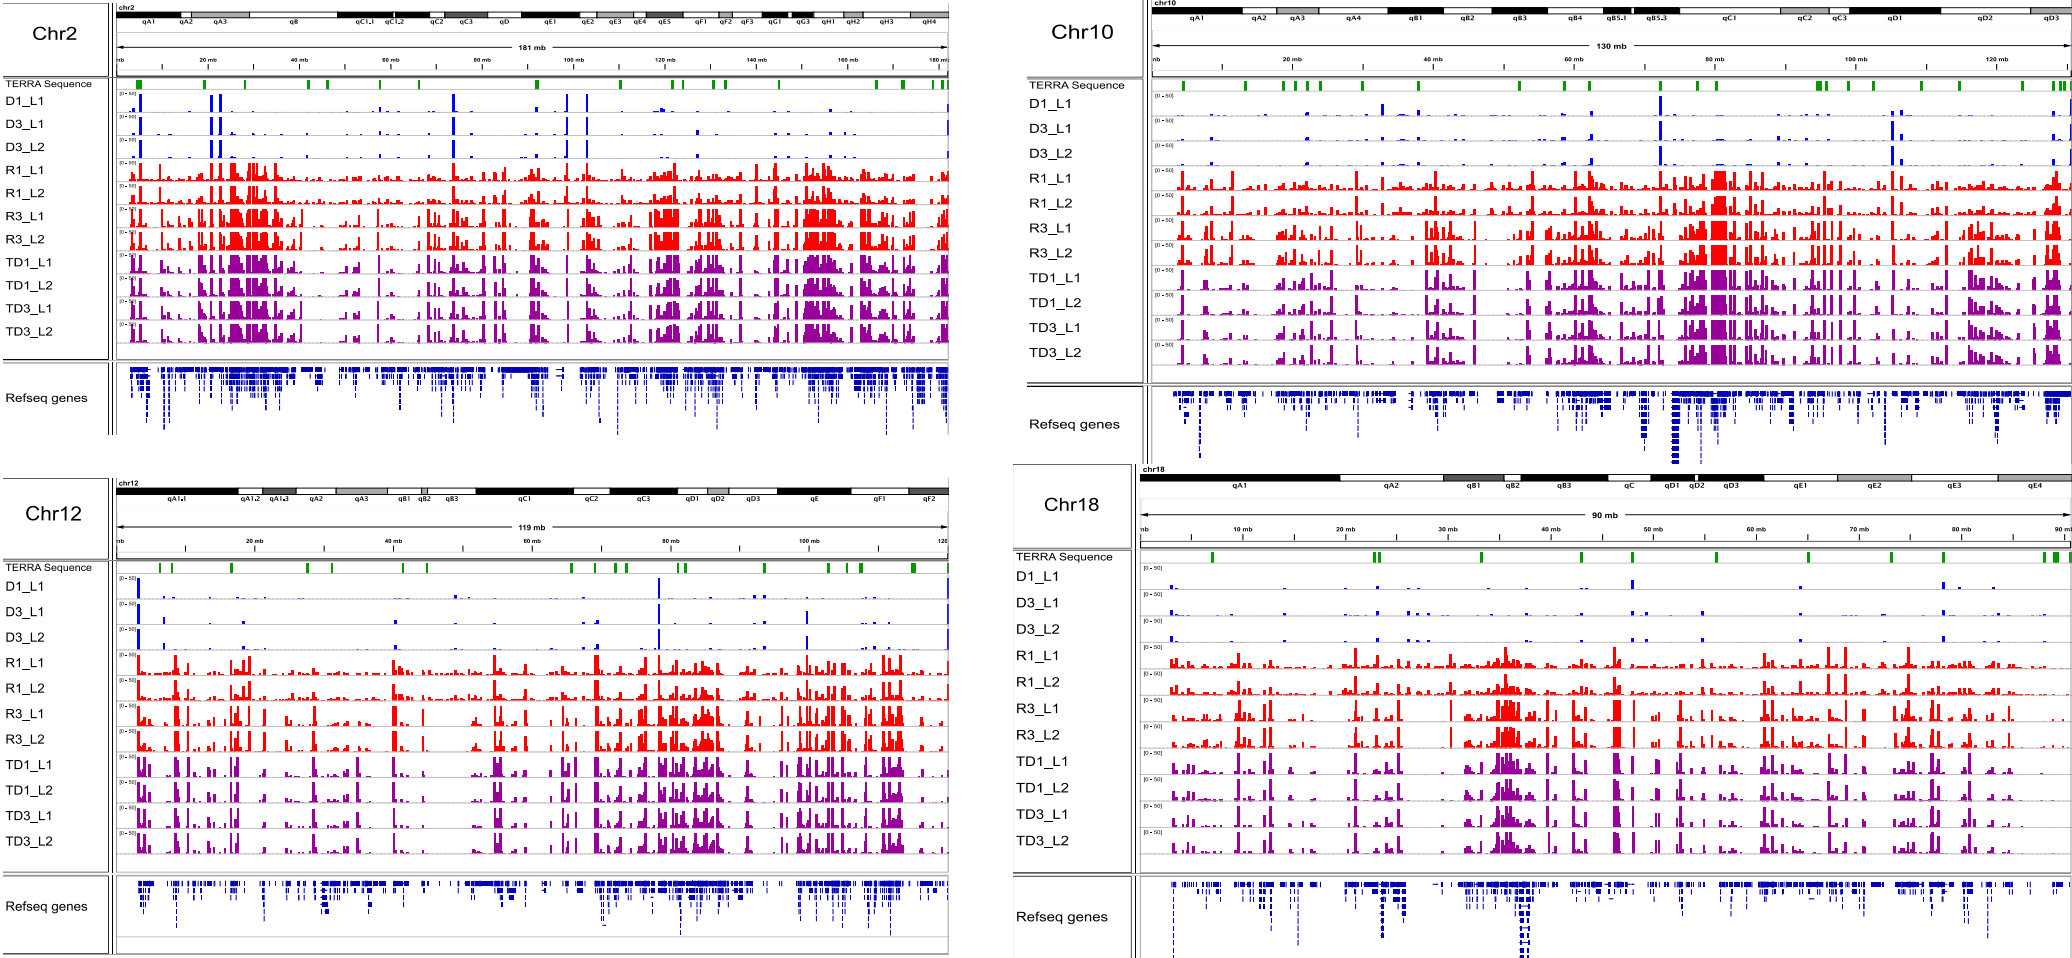

**Supplementary Figure S4.** Examples of landscapes expression signals of the chromosomes 2, 10, 12 and 18 (mice). For each chromosome, the green bars shows the location of TERRA-homologous regions (minimum 4 consecutive TTAGGG repeats). The following tracks show different sperm samples (D1-D3 are DNA-bound RNA, R1-R3 are cytoplasmic RNA, and TD1-TD3 are from testes DNA-bound RNAs). The heights of the peaks show normalized expression level (number of reads per 10<sup>7</sup> reads) over each genomic region, with equal 0-50 scale. Known genes in RefSeq database are located at the bottom of each panel.

**Peak annotation on entire genome.**

**Supplementary Figure S5a.** DRNA intergenic regions components

| Detailed Annotation | number |
|---------------------|--------|
| Simple_repeat*      | 4212   |
| Low_complexity      | 400    |
| LINE                | 184    |
| SINE                | 104    |
| LTR                 | 102    |
| Satellite           | 87     |
| rRNA                | 35     |
| DNA                 | 3      |
| srpRNA              | 2      |
| Other               | 2      |
| snRNA               | 1      |

**5b.** Number of simple repetitive sequences in DRNA intergenic regions

| Motif  | N    | Motif  | n    |
|--------|------|--------|------|
| GAAA   | 1201 | TTTC   | 1053 |
| GAA    | 551  | TTC    | 517  |
| GGAAA  | 113  | TTTCC  | 93   |
| GGAA   | 86   | GA     | 83   |
| TC     | 83   | GAAAA  | 67   |
| TTTTTC | 57   | TTCC   | 56   |
| TTAGGG | 33   | CCCTAA | 24   |
| TTCTC  | 24   | TTCTCC | 14   |
| GGGAA  | 11   | GGA    | 7    |

Supplementary Table S1

List of mouse and human tissues  
and culture cell lines

| Species               | Tissues ex vivo                                    | ALT status                   | Restriction cleavage | TaTR signal |
|-----------------------|----------------------------------------------------|------------------------------|----------------------|-------------|
| Mouse tissues ex vivo | Embryo fibroblasts                                 | Negative                     | MspI                 | ++          |
|                       | Testis                                             | ND                           | MspI                 | +++         |
|                       | Sperm                                              | ND                           | MspI                 | +++++       |
|                       | Brain                                              | ND                           | MspI                 | ++          |
|                       | Mouse cell lines                                   | 15P1, PY6, 45T1,MTT3 CCL39TK | MspI                 | +           |
| Rat cell lines        | FR3T3, FR-RAS, BPV-1, BPV-5, SVWTAII, SWTN2, WTRSV | ND                           | MspI                 | +           |
|                       |                                                    |                              |                      |             |
| Human cell lines      | RAJI                                               | Positive                     | MspI                 | +           |
|                       | HELA                                               | ND                           |                      |             |
|                       | 293                                                | ND                           |                      |             |
|                       | human U-2 OS cancer cell line (ATCC® HTB-96™)      | Positive                     |                      |             |
|                       |                                                    |                              |                      |             |
| Human                 | Saliva                                             | ND                           | MspI                 | +++         |
|                       | Sperm                                              | ND                           | MspI                 | +++         |

| Subtelomeric sequences <sup>20</sup>     | Probe sequence                                                                                                                                                 |
|------------------------------------------|----------------------------------------------------------------------------------------------------------------------------------------------------------------|
| Chromosome 18 short arm<br>(NT_039674.8) | GGGACATCTTCTGGATATATGCCCAGGAGAGGTATTG<br>CAATACCTCTCCTGGGCATATATCCAGAAGATGTCCC                                                                                 |
| Chromosome 18 long arm<br>(NT_039678.8)  | ACAGAGGTGAGGCCAGTGTCACTGTGCCCTTCTTT<br>TGCCACAGATTTTAATATTAAACACATATAAAATA<br>TATTTTATATGTGTTTAATATTTAAATCTGTGGCA                                              |
| Chromosome 9 short arm<br>(NT_039471.8)  | TCACGTTTTTCAGTGATTTTGTCATTTTTCAAGTTGT<br>ACAACCTGAAAAATGACAAAATCACTGAAAAACGTGA                                                                                 |
| Chromosome 9 long arm<br>(NT_166313.2)   | CTTGGCTGTCTTGGAATTCACTTTGTAGACCAGGCT<br>CTGTCTCCCTGGGATTAAAGGCATGCACCACCATGC<br>CTCTTTTATGCATTTTGAGATGATCTTGTCTGGAAAG<br>CTTTCCAGGACAAGATCATCTCAAATGCATAAAAGAG |
| Chromosome 17 long arm<br>(NT_039649.8)  | GGCAGAGGCAAGAGGATCTCTGTGAATTCCAGGTAAG<br>CTTACCTGGAATTCACAGAGATCCTCTTGCTCTGCC                                                                                  |
| Chromosome 19 long arm<br>(NT_082868.6)  | GCTGAATAGATGGTTCTATGTTTATTCCTAAGAAATAG<br>GTTTATTGGATCTTCACAGGAATACCCCACTCTGCTG<br>GCTGCAGAGTGGGGTATTCCTGTGAAGATCCAATAAAC                                      |
| Chromosome X long arm<br>(NT_165788.2)   | GTCTGGGTCTTTGGAGAGGCTGGCTTAGGGGCTAAAG<br>CTTTAGCCCCTAAGCCAGCCTCTCCAAAGACCCAGTC                                                                                 |
| Chromosome X short arm<br>(NT_039699)    | GCAGAGCATTCACTACTCACTAACC<br>GGTTAGTGAGTACTGAATGCTCTGC                                                                                                         |
| Chromosome Y (NT_187051.1)               | GTTTGTACGGAATAGAGAAAAGTGTGGCAGAAAAGCG                                                                                                                          |

Supplementary Table S2 Deoxyribonucleotide probes

| Noncoding RNAs |                                                  |
|----------------|--------------------------------------------------|
| Terra          | CCCTAACCCCTAACCCCTAACCCCTAACCCCTAACCCCTAACCCCTAA |
| Terra-reverse  | TTAGGGTTAGGGTTAGGGTTAGGGTTAGGGTTAGGGTTAGGGTTAGGG |
| Sine B2        | GTCCTGAGTTCAATCCCAGCAACCACATGGTGGCTCACAACCATC    |
| Xist           | CCAGCCATGTTTGCTCGTTTCCCGTGGATGTGCGGT             |

**Supplementary Table S3.** Characterize feature name, length, position and retrieved sequence of different transcripts for a single region of each rare high-peak signals which are presented in the sperm DRNA (blue star peak in Fig. 4) fraction as well in free-RNA fraction and the testes DRNA for sequence homology.

| Region       | sam<br>ples | Gene ontology                                                  | library                                     | p-value     | Enriched genes                                                                                     | Num<br>ber<br>of<br>total<br>gene<br>s |
|--------------|-------------|----------------------------------------------------------------|---------------------------------------------|-------------|----------------------------------------------------------------------------------------------------|----------------------------------------|
| 3′           | dRNA        | positive regulation of flagellated sperm motility (GO:1902093) | GO Biological Process 2018                  | 0.00002624  | RNASE10;TACR2                                                                                      | 27                                     |
|              |             | regulation of flagellated sperm motility (GO:1901317)          |                                             | 0.00006281  | RNASE10;TACR2                                                                                      |                                        |
| 5′           | dRNA        | MP:0009833_absent_sperm_mitochondrial_sheath                   | MGI Mammalian Phenotype 2017                | 0.001399    | Spata6                                                                                             | 7                                      |
|              |             | MP:0009234_absent_sperm_head                                   |                                             | 0.002098    |                                                                                                    |                                        |
|              |             | MP:0009834_abnormal_sperm_annulus_morphology                   |                                             | 0.002448    |                                                                                                    |                                        |
|              |             | MP:0008893_detached_sperm_flagellum                            |                                             | 0.002797    |                                                                                                    |                                        |
|              |             | MP:0002662_abnormal_cauda_epididymis_morphology                |                                             | 0.003146    |                                                                                                    |                                        |
| exon         | dRNA        | Spermatozoon                                                   | Jensen TISSUES                              | 0.00004370  | ODF1;AKAP4;AKAP3                                                                                   | 101                                    |
|              |             | Spermatid                                                      |                                             | 1.476e-11   | SMCP;PRM1;ODF1;ODF2;TXNDC2;YBX2;HSPA2;PGK2;TNP2;AKAP4;AKAP3;H1FNT                                  |                                        |
|              |             | Sperm_fibrous_sheath                                           | Jensen COMPARTMENTS                         | 0.000002472 | PGK2;AKAP4;AKAP3                                                                                   |                                        |
|              |             | Sperm_flagellum                                                |                                             | 5.731e-7    | ODF1;ODF2;PTCHD3;PGK2;AKAP4;AKAP3                                                                  |                                        |
|              |             | Male_germ_cell_nucleus                                         | MGI Mammalian Phenotype 2017                | 0.001899    | HSPA2;TNP2                                                                                         |                                        |
|              |             | MP:0004542_impaired_acrosome_reaction                          |                                             | 5.671e-8    | SMCP;ATP8B3;ODF1;TNP2;OAZ3                                                                         |                                        |
|              |             | Male_infertilit                                                | Jensen DISEASES                             | 1.056e-10   | CRISP2;PRM1;ODF1;TXNDC2;YBX2;HSPA2;PGK2;TNP2;AKAP4;AKAP3;OAZ3                                      |                                        |
| Promoter-TSS | dRNA        | H3K36me3_testis_mm9                                            | ENCODE Histone Modifications 2015           | 0.007206    | SNORA62;ZC3H10;BC005537;9230105E05RIK;SNORD15B;PRM2;SCARNA10;RNF138;UBE2N;DBIL5;PHF7;1700017D01RIK | 55                                     |
| TTS          | dRNA        | Epididymitis                                                   | Jensen DISEASES                             | 0.008968    | TUBB4B                                                                                             | 36                                     |
| Intron       | dRNA        | MP:0011610_abnormal_primordial_germ_cell_apoptosis             | MGI Mammalian Phenotype 2017                | 0.001724    | BRIP1, WNT5A, ROR2                                                                                 | 1147                                   |
|              |             | testis                                                         | Tissue Protein Expression from ProteomicsDB |             |                                                                                                    |                                        |

**Supplementary Table S4.** Gene set enrichment analysis of different regions using Enrichr tool in DRNA from sperm and testes.

| Region       | samples | Gene ontology                                                    | library                      | p-value   | Number of total genes |
|--------------|---------|------------------------------------------------------------------|------------------------------|-----------|-----------------------|
| 5'           | TD      | dosage compensation by inactivation of X chromosome (GO:0009048) | GO Biological Process 2018   | 0.001753  | 921                   |
| exon         | TD      | RNA processing (GO:0006396)                                      | GO Biological Process 2018   | 2.496e-8  | 7742                  |
|              |         | protein ubiquitination (GO:0016567)                              |                              | 4.05E-09  |                       |
|              |         | Nucleoplasm                                                      | Jensen COMPARTMENTS          | 2.011e-17 |                       |
|              |         | RNA binding (GO:0003723)                                         | GO Molecular Function 2018   | 1.565e-12 |                       |
|              |         | MP:0001925_male_infertility                                      | MGI Mammalian Phenotype 2017 | 2.508e-7  |                       |
|              |         | centrosome (GO:0005813)                                          | GO Cellular Component 2018   | 8.756e-16 |                       |
| Promoter-TSS | TD      | MP:0009834_abnormal_sperm_annulus_morphology                     | MGI Mammalian Phenotype 2017 | 0.002039  | 1852                  |
| Intron       | TD      | MP:0001925_male_infertility                                      | MGI Mammalian Phenotype 2017 | 6.839e-12 | 8709                  |
|              |         | MP:0006380_abnormal_spermatid_morphology                         |                              | 1.796e-9  |                       |
